# Supplementary material for: MicroRNA molecular profiling identifies potential signaling pathways conferring resistance to chemoradiation in locally-advanced rectal adenocarcinoma
Source: PubMed Central journal article supplement (PMC6034754; doi:10.18632/oncotarget.25652), 2018-06-22
Supplement: oncotarget-09-28951-s001.pdf [file oncotarget-09-28951-s001.pdf]

## **MicroRNA molecular profiling identifies potential signaling pathways conferring resistance to chemoradiation in locally-advanced rectal adenocarcinoma**

### **SUPPLEMENTARY MATERIALS**

**Supplementary Table 1: miRNAs significantly (FDR <.05) up or downregulated following chemoradiation**

See Supplementary File 1

**Supplementary Table 2: miRs and published effect on carcinoma proliferation**

| <b>miR</b> | <b>Fold change post treatment</b> | <b>Reported effect on carcinoma proliferation based on literature</b> | <b>Final functional prediction on carcinoma proliferation</b> |
|------------|-----------------------------------|-----------------------------------------------------------------------|---------------------------------------------------------------|
| let-7c     | 2.592                             | Decreases                                                             | Decreased                                                     |
| miR-145    | 4.133                             | Decreases                                                             | Decreased                                                     |
| miR-143    | 2.281                             | Decreases                                                             | Decreased                                                     |
| miR-19b    | -2.352                            | Increases                                                             | Decreased                                                     |
| miR-99a    | 6.699                             | Decreases                                                             | Decreased                                                     |
| miR-93     | -2.011                            | Increases                                                             | Decreased                                                     |
| miR-203a   | -2.876                            | Decreases                                                             | Increased                                                     |
| miR-200c   | -3.315                            | Unknown                                                               | Unknown                                                       |

Column 2 shows the fold change after therapy in our dataset while column 3 shows the reported effect that increased expression of a miR would have on carcinoma proliferation from a published literature review. For example, let-7c was found to be increased after treatment, and the literature reports that increased let-7c levels correlate with decreased proliferation. Conversely, miR-19b was found to be *decreased* post treatment in our data, and increased miR-19b levels correlate with increased carcinoma proliferation, therefore with decreased miR-19b levels we would expect decreased proliferation. In conclusion, the changes observed in 6 of the 8 miRs (let-7c, 145, 143, 19b, 99a, 93) support that there is decreased carcinoma proliferation in the post-treatment samples.
